# Supplementary material
Source: publisher site journal article supplement (https://www.dovepress.com/article/217362)
Supplement: Supplementary file 1 [file get_supplementary_file.php]

# SUPPLEMENTARY MATERIAL

## Tables

**Table S1. Viability of HEC-1A cells and bacterial strains in different culture conditions.**

| Cell type                      | Culture conditions |       |       |              |       |       |
|--------------------------------|--------------------|-------|-------|--------------|-------|-------|
|                                | 5% CO <sub>2</sub> |       |       | Anaerobiosis |       |       |
|                                | 24 h               | 48 h  | 72 h  | 24 h         | 48 h  | 72 h  |
| HEC-1A                         | 96±2%              | 96±3% | 97±2% | 75±4%        | 65±5% | 46±4% |
| <i>Lactobacillus vaginalis</i> | 90±5%              | 92±4% | 85±5% | 90±4%        | 89±6% | 91±3% |
| <i>Atopobium vaginae</i>       | 89±4%              | 79±5% | 70±6% | 85±3%        | 83±2% | 88±4% |
| <i>Porphyromonas somerae</i>   | 74±3%              | 65±6% | 41±6% | 84±4%        | 79±5% | 80±5% |

All cells were cultured in McCoy's 5a Medium Modified added with 10% fetal bovine serum.

Cell viability was assessed at the indicated times by cell count after Trypan Blue exclusion for HEC-1A cells, and by CFU count on blood-agar plates for bacterial strains.

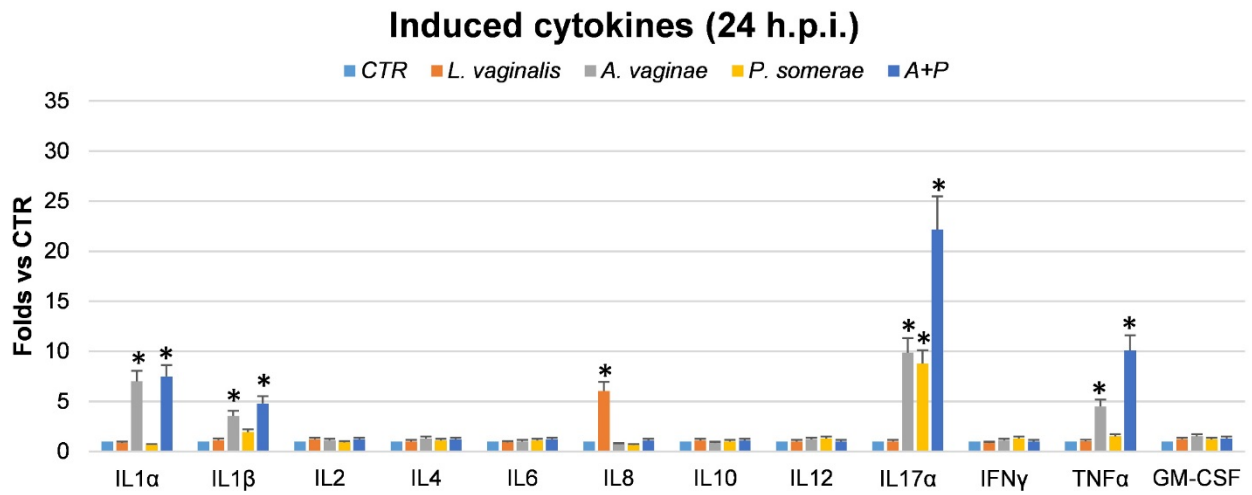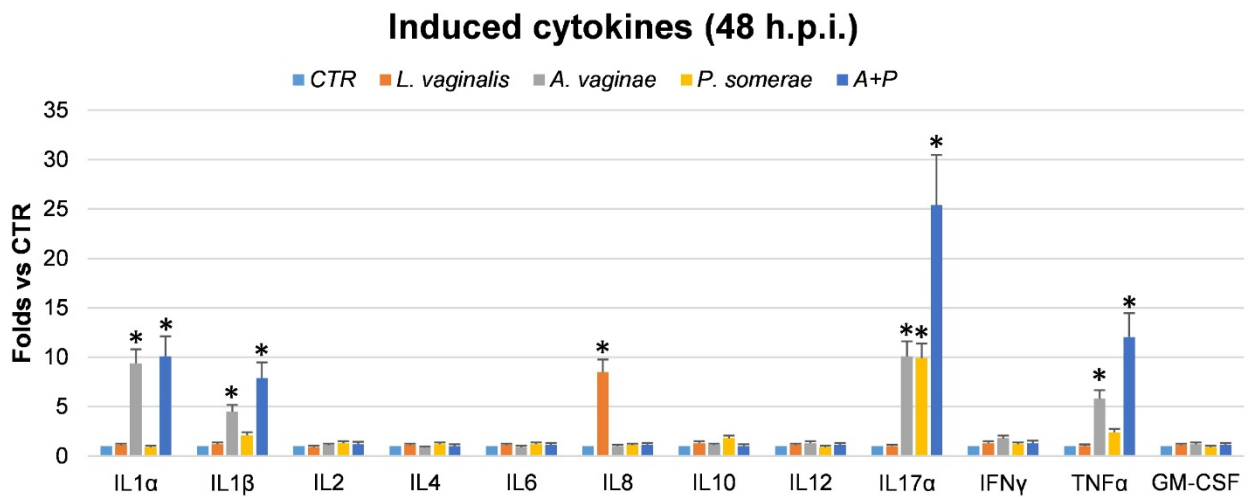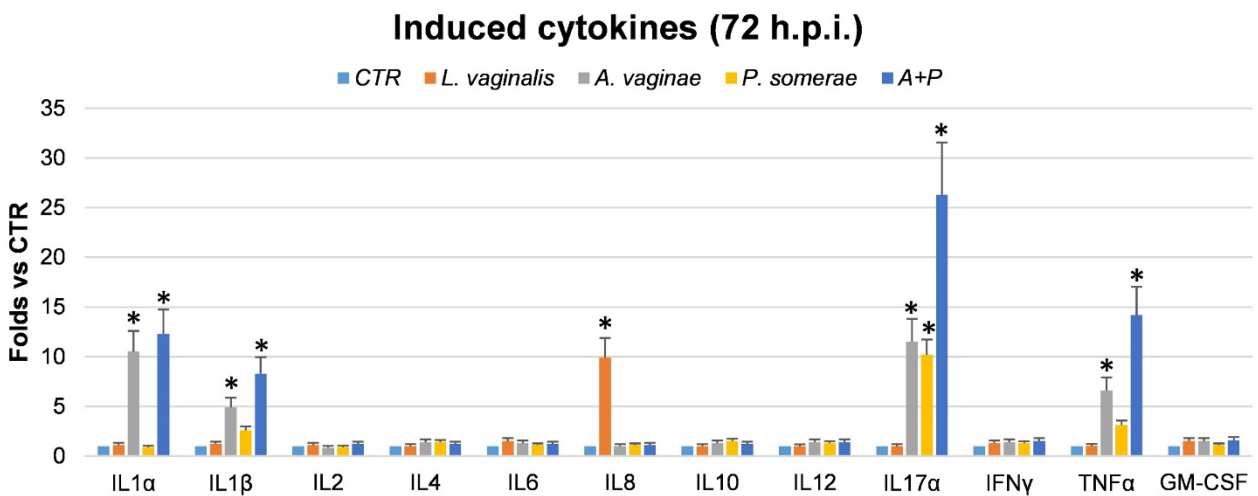

**Figure S1. Cytokine induction in endometrial HEC-1A cells by bacterial co-culture.** Endometrial cells were cultured in the absence (control) or presence of alive or killed *A. vaginae* (AV), or *P. somerae* (PS), or

*L. vaginalis* (LV), or a combination of *A. vaginae* plus *P. somerae* (AV+PS). After 24-48-72 hours, culture supernatants were collected and analyzed for cytokine release by a multi-cytokine qualitative ELISA assay targeting IL1 $\alpha$ , IL1 $\beta$ , IL2, IL4, IL6, IL8, IL10, IL12, IL17 $\alpha$ , IFN $\gamma$ , TNF $\alpha$ , and GM-CSF. Results refer to triplicate samples from two independent experiments and are expressed as mean fold-change vs control value (infected/uninfected control OD values)  $\pm$  SD. Results obtained by exposing endometrial cells to killed bacteria were superimposable with those obtained in control uninfected cells ( $1\pm 0.1$  folds), and are therefore represented by CTR bar. Student's *t* test was used for statistical analysis; a *p* value  $< 0.05$  was considered as significant (indicated by asterisks).
